# Supplementary material for: The linear mitochondrial genome of the quarantine chytrid Synchytrium endobioticum; insights into the evolution and recent history of an obligate biotrophic plant pathogen
Source: BMC Evol Biol. 2018 Sep 10;18:136. doi: 10.1186/s12862-018-1246-6 (PMC6131824; doi:10.1186/s12862-018-1246-6)
Supplement: Supplementary file 2 — Table S1. mitogenomes and mitochondrial genes included in the Bayesian inference (BI) of phylogeny Table S2. SNP percentages of polymorphic sites relative to the S. endobioticum 1(D1)_MB42 mitogenome Table S3. Mitochondrial haplotype classification of S. endobioticum isolates based on informative sites in coding sequences of seven mitochondrial genes Table S4. Fungal materials and NexGen sequence information. (XLSX 56 kb) [file 12862_2018_1246_MOESM2_ESM.xlsx]

## Sheet: 1. mtDNA genes included in BI
	Table S1. mitogenomes and mitochondrial genes included in the Bayesian inference (BI) of phylogeny.
	Genes indicated with a blank box were not detected on the mitochondrial genome or mitochondrial scaffold(s).
	Genes indicated with a black box were detected, aligned and used for BI of phylogeny.
	Species	Strain	mtDNA scaffolds	length (bp)	atp6	atp8	atp9	cob	cox1	cox2	cox3	nad1	nad2	nad3	nad4	nad4L	nad5	nad6	Accession(s)
	Synchytrium endobioticum	MB42	1	72865	g	g	g	g	g	g	g	g	g	g	g	g	g	g	ERZ668671
	Chytridium confervae	CBS 675.73	1	225604	g	g	g	g	g	c	g	g	g	g	g	g	g	g	ERZ681044
	Powellomyces hirtus	CBS 809.83	3	298453	g	g	g	g	g	g	g	g	g	g	g	g	g	c	ERZ681050
	Spizellomyces palustris	CBS 455.65	1	126474	g	g	g	g	g	g	g	g	g	g	g	g	g	g	ERZ681046
	Synchytrium microbalum	JEL517	1	23811	g	g	g	g	g	g	g	g	g	g	g	g	g	g	ERZ681045
	Synchytrium taraxaci	Stara13	14	39246	g	g	g	g	g	g	g	g	g	g	g	g	g	g	ERZ681051
	Allomyces macrogynus	ATCC 46923	1	57473	g	g	g	g	g	g	g	g	g	g	g	g	g	g	NC_001715
	Batrachochytrium dendrobatidis	JEL423	1	175284	g	g	g	g	g	g	g	g	c	g	g	g	g	g	DS022322
	Harpochytrium sp.	JEL94	1	19473	g	g	g	g	g	g	g	g	g	g	g	g	g	g	AY182005
	Harpochytrium sp.	JEL105	1	24169	g	g	g	g	g	g	g	g	g	g	g	g	g	g	AY182006
	Hyaloraphidium curvatum	SAG 235-1	1	29593	g	g	g	g	g	g	g	g	g	g	g	g	g	g	AF402142
	Monoblepharella sp.	JEL15	1	60432	g	g	g	g	g	g	g	g	g	g	g	g	g	g	NC_004624
	Rhizophydium brooksianum	JEL136	1	68834	g	g	g	g	g	g	g	g	g	g	g	g	g	g	NC_003053
	Spizellomyces punctatus	-	3	61347	g	g	c	g	g	g	g	g	g	g	g	g	g	g	NC_003052, NC_003060, NC_003061

## Sheet: 2. SNP frequencies
	Table S2. SNP percentages of polymorphic sites relative to the S. endobioticum 1(D1)_MB42 mitogenomes. Cells are colored on a heat-map gradient.
	Position	Reference	FERA1	FERA 2	38 Nevsehir	18T1 SE7	18MB17	18t1_7WS	8F1_6WS	8f1 Denmark	2G1_2WS	2G1_SE4	6O1_SE5	6O1_SE6	39p1_8Ws	BELARUS	EII2015	1D1_01WS	Ukraine	Peru	1D1_MB42	1D1 brabant	Leningrad	2CH1_03WS	3M1_4WS	P40 9WS	P41_10WS	2G1_MB08	LEV6602	LEV6687	LEV6748	LEV6574
	57	A	100	100	99.754	93.5518	99.8857	99.7988	99.6546	100					100	91.1765	70	99.4012	46.875				52.5
	75	A	64.0934	66.8449	81.2781	93.0279	99.8971	99.4152	99.8459	100
	88	C									99.6904	99.4764	89.5238	99.6564
	94	G	71.0588	68.9427	81.1481	93.0168	99.6344	99.6212	99.7297	99.9044
	167	G	64.5418	66.9643	80.9403	92.19	99.3797	99.4012	99.1004	100	99.8294	98.9173	88.0658	99.2644	99.8161	50				28.3796			29.5082
	168	G	64.5418	66.9643	80.9403	92.19	99.3797	99.4012	99.1004	100	99.8294	98.9173	88.0658	99.2644	99.8161	50				28.3796			29.5082
	175	C	65.0718	68.1592	80.8508	92.3263	99.6635	99.6324	99.1438	99.8729	99.8288	99.3327	88.6548	99.6032	100	51.3514				28.369			31.5789
	1061	A	66.6667	57.3913	80.3711	89.7759	99.4259	99.7257	99.6082	100
	1622	T	67.2414	70.1754	99.6452	90.9189	100	99.1736	99.3761	99.9688
	1623	C	67.2414	70.1754	99.6452	90.9189	100	99.1736	99.3761	99.9688
	2151	C			18.6215						100	99.9652	86.654	99.7631	100					99.9876
	2156	G			18.1091						100	99.844	86.5503	99.7269	99.9666					99.9254
	3310	A	79.668	79.5276	78.1792	89.9247	99.0173	98.5065	99.1192	99.0555
	3333	A	78.9474	85.4545	78.6814	89.2186	98.0218	98.8429	98.5302	98.8764
	3485	G	76.8786	79.3296	78.7331	90.8903	99.6686	99.8387	99.4927	99.9784
	4182	G	78.2609	79.0451	99.713	91.0456	99.1144	99.8166	99.7919	99.9819	99.6366	14.8275
	4860	G																		66.3378
	4865	G																		66.5755
	5803	C	12.0482										13.5224			23.4043	28.169		43.3962		27.2597		60	99.7284	99.761	99.7245	98.8806	95.1644	99.8822	99.9169	99.9652	99.8565
	5908	A									98.0037	95.6656	85.6281	98.0493						11.5861
	6061	C									99.9401	99.6397	84.2451	99.7582						99.9731
	6070	T	70.5628	72.1973	98.2109	88.4765	95.1824	97.5911	98.0438	98.0815					98.1184	48.3333					54.5096	98.3689	31.2821
	9419	T	69.5545	76.2943	78.1879	91.22	98.5284	99.6983	99.6925	99.9624
	12178	T			19.5568				99.0617											72.0399
	12187	T									99.613	99.5812	85.189	99.7755
	13384	C	88.8889	100	99.3309	91.7808	97.0326	98.7421	96.5658	98.6243	99.6364	99.4017	77.3973	99.3266		46.1538	93.3333	99.2647	100	13.1665			97.7273
	13396	A	100	100	76.4281	94.4072	99.4949	100	98.3462	100	99.8084	99.3143	78.6301	99.5346		75	93.75	99.3506	100	15.0336			94.2149
	14096	T	67.4033	68.5393	99.1726	87.931	91.8265	98.8171	99.5671	99.1429	89.2308	86.2535	74.8436	86.0424						61.194
	14102	G									76.1364	75.4154	55.0661	75.2269						35.2789
	14108	T	63.5838	66.0714	98.7494	94.1904	95.6053	98.6388	99.6333	99.3752	87.9075	85.5882	70.1854	86.1044						63.5494
	14114	G	50.6329	52.0548	94.3775	67.4196	68.0291	92.2497	89.2381	95.47	31.4344	33.8786	25	34.2485						14.4537
	14120	T	60.8108	66.4062	98.9709	84.4804	89.3071	98.7805	99.1622	99.3906	97.5345	96.3019	71.7358	96.7978						64.9501
	14174	T	39.726	43.0769	99.3584	82.3582	92.8571	99.2268	99.4582	99.7219										28.7748
	14574	C			21.6911						99.7411									11.468
	14588	C																		70.6804
	16221	A											14.0212			25			50	10.6523	35.5583		53.5714					95.3756	99.8879	99.8565	100	99.9097
	18933	A	99.7024	98.9305	78.1091	88.5527	98.4772	99.9652		99.9753	99.8361	96.1534	86.2797	99.7966	99.9348	73.5849	77.7778	99.8304	45.5882	99.7178			69.0265
	19731	A	73.4884	79.3427	99.8569	92.7004	98.0498	99.7797	99.6308	99.945
	22453	A	72.6496	73.4127	78.2161	89.7547	99.6178	99.8019	99.4636	100										25.9363
	23657	G										50.9763	99.5021	98.4791		12.9032	15.2542		15.3846	75.6027	30.2713			99.591	98.8166	98.4026	99.2727	93.5877	99.6539	99.7523	99.5509	99.6384
	24473	T			20.2824										99.8981
	28006	T	81.8182	70.8333	31.2308	38.6262	36.4444	37.232	50.6775	34.5112	37.1697	32.0926	45.0053	30.9772	44.1942	38	37.8378	44.086	45.1613	52.5128	35.7534	40.7129	31.8182	36.1086	34.0712	33.0961	34.3284	33.0699	32.3301	28.6591	31.3338	41.7416
	28007	C	11.6279	26	67.6178	58.8235	61.1973	61.9368	44.3275	64.1809	62.2476	66.4081	52.1647	67.9773	54.3796	60.4167	58.8235	53.3835	56.6667	44.4494	62.4166	57.6827	64.8485	63.4775	64.3141	67.0213	64.433	65.8155	65.0113	68.8774	65.848	54.2328
	28010	G	81.8182	59.4595	23.5069	34.5051	29.1284	29.8535	46.6355	28.342	25.7991	23.3175	37.8863	21.9972	33.7517	29.0323	30.9524	33.9254	38.2353	44.7855	27.7296	30.3313	22.7273	25.2396	23.8754	22.063	26.9406	24.3353	26.7736	20.9924	22.2327	33.2565
	28011	T			20.4555			13.545	14.9425	13.7088	21.2838	22.9895	13.0577	24.0807	18.2713	25	20	15.3409	12.5	13.6242	18.815	17.7378	20.8333	21.1121	20.8413	25.3125	16.8317	24.2979	11.3437	18.592	18.6828	15.193
	28012	C		23.0769	51.617	50.3546	54.5553	50.5063	37.299	53.5496	45.1378	49.6601	42.1	50.0018	40.8941	45.3125	41.0256	41.8182	41.1765	34.5767	47.1686	43.5909	50.9901	45.9506	47.7461	45.9459	48.1132	48.0867	58.6694	56.3923	54.2557	48.0321
	28015	C		20.9302	32.9671	31.4229	39.7112	39.538	29.0155	43.6488	42.32	45.4663	39.0595	45.4778	37.1447	43.0769	38.0952	38.3128	38.8889	30.7087	43.318	40.1257	45.3608	42.7852	44.1629	43.1953	45.7547	42.1912	55.7376	53.9353	51.4835	45.5906
	28016	A			25.8843	10.4294	11.7942	17.9416	16.7849	18.8498	24.4622	26.3183	16.6023	28.1004	20.1448	28.7879	19.5122	17.5439	13.5135	18.3472	21.9228	21.2013	23.7374	25	23.9707	28.7879	20.0935	28.4019	12.8914	20.4311	20.5534	15.7789
	28020	C	11.3636	31.25	40.8738	35.1378	41.3706	38.498	27.5377	43.746	35.624	38.2083	28.2076	38.8247	31.1475	39.7059	32.6087	29.7872	30	25.3743	35.5031	31.6621	38	35.8828	37.3568	35.6707	36.2319	37.2084	52.2904	50.4591	47.0607	41.3604
	28036	A	28.125	18.1818	12.2852	14.3611		10.8031	19.8844	12.3561	25.6601	25.2003	40.0225	24.6026	36.8732	30.7692	23.2558	37.8531	41.6667	49.0035	29.7775	35.879	23.2955	26.615	26.4925	23.5294	31.8408	24.535	25.2321	19.9552	22.7084	33.1779
	28037	G	18.75	25.7143	47.5905	40.7107	46.0481	38.9755	27.1255	43.4377	45.7269	45.6441	43.0633	47.4417	40.4889	42.623	50	38.7833	30.4348	34.1732	42.7339	46.7572	45.8333	44.3439	43.7059	45.7237	40.2116	47.0696	22.4794	31.2105	31.0502	24.6789
	28041	A	47.5	57.8947	50.404	67.9825	77.4153	67.4942	64.5661	60.8044
	28042	C	47.5	57.8947	50.404	67.9825	77.4153	67.4942	64.5661	60.8044
	28045	C	64.9123	77.7778	72.0627	84.9057	95.4596	93.7173	78.9648	88.9229
	30402	T											13.5305		89.2935	82.2581	31.25		43.6364		35.8191		80.9524	99.9533	99.7472	100	98.773	95.2009	99.9538	99.9345	99.9731	99.9336
	32424	A	82.0078	77.4574	92.4031	91.7135	98.3353	99.7925		99.9895	98.4338	15.4623	85.5784	99.8033	100	52.8302				28.199			33.7209
	32766	T	81.3875	79.8752	78.9158	90.5803	99.5286	99.6773		99.9778
	34627	C	77.3006	77.0624	99.7823	92.6239	99.7628	99.7625	99.5582	99.9219	99.7993	99.9686	85.4452	99.7364						99.9515
	34629	T	76.7347	76.2	99.8096	92.3968	99.8009	99.7214	99.8026	99.9439	99.8489	99.6956	85.1725	99.7601						99.9586
	34804	T									99.9123	99.4697	84.8189	99.7349						99.9563
	35201	A									99.9031	90.5044	85.1574	99.7678						99.9613
	35434	T	76.4368	76.5	79.0323	90.099	99.9671	99.7656	99.7178	99.9346
	35860	T	77.9349	78.8006	78.6584	91.5953	99.7132	99.7047	99.5598	99.9784										71.692
	36040	A	78.2	76.4298	99.7851	93.2888	99.7889	99.5178	99.5492	99.9252
	37631	T	72	70.8333	98.9194	92.7165	98.8024	97.7504	99.1707	99.2873										73.3586
	42720	A			20.4346						99.5864									70.8714
	43554	G	79.0476	71.5054	80.4383	90.5561	99.7106	99.7352	99.7934	99.9183	99.7399	99.7533	85.2308	99.7667						91.1902
	44890	A	35	23.5294	99.2699	85.0746	94.7368	98.8095	97.5569	99.3797
	47977	T	17.3913			24.6341	30.2703
	48054	C	18.9189	12.9032
	48059	C		10.3448
	48062	A	10.3448
	48063	C
	48073	G
	48635	A	73.9336	68.1373	99.7924	91.9799	99.8208	99.7487	99.721	99.943					99.9676	60				15.7412			38.3333
	49299	T																		82.3372
	50257	C	76.7705	79.0071	99.7187	91.2908	99.3271	99.5862	99.7789	99.9734
	50628	T
	50711	C	20
	53477	T	78.5354	74.5946	99.807	89.6938	99.9208	100	99.7854	99.9654		35.117					76.1194	84.7503
	54265	T	72.0833	70.9804	86.8574	90.1726	99.5997	99.544	67.104	99.915		83.9429	85.333	98.4999						79.5556
	54668	A																		71.9278
	57247	G	17.6471	14.8571	19.6451				96.787		99.7879	99.9712	83.7634	99.7789						15.6172
	57506	A	70.7865	67.9825	99.8016	91.1429	96.6264	99.8996	99.92	100	99.8763	31.2053								98.4956
	57544	A	68.4989	68.0258	99.7739	89.7246	99.9335	99.7985	99.9194	99.9806	99.8388	99.8479	86.7257	99.737						90.4559
	57563	T																		81.9692
	57836	T	75.6923	76.175	79.031	91.1238	97.1707	99.9027	99.7538	99.9529										10.4861
	58689	T									99.6988	88.4727	85.2	99.806						17.1367
	58821	T															28.7234				36.8769			99.8003	99.6523	99.7934	99.5086		99.7587	99.7877	99.9712	99.946
	58922	T																		71.2224
	59378	T	74.946	73.6842	78.1227	90.176	98.6301	99.1261	99.0346	99.0758	99.3112	98.5726	84.2486	98.9247						27.1082
	62060	T	77.8744	75.8416	99.7089	90.4174	95.7751	99.8153	99.5376	99.8539	99.8671	99.7655	85.7706	99.6273
	62140	A	76.3377	76.0943	79.1496	90.9178	97.3113	99.6348	99.552	99.9459
	62487	A	75.4808	77.0115	79.4668	89.4638	98.831	99.6406	99.4534	99.9666										18.3704
	63144	T				10.174							11.0551			33.3333	33.7838		43.4783	11.1733	28.5288		61.7978	99.8878	99.7268	99.8261	99.7183	95.378	99.9598	99.949	100	99.8493
	63747	T	75.9434	72.9323	77.3197	88.0758	98.0085	98.2284	98.4199	97.0628		76.2384	82.1944	97.1767						86.3431
	63861	T	79.8165	75.1756	99.7787	91.0426	99.9286	99.6668	99.6178	99.913	99.8588	22.9257
	64629	A			18.4458				94.3213
	64698	T	78.6642	76.5683	99.8591	99.9523	99.906	99.7743	99.7776	99.9759	99.8687	99.9701	99.9692	99.9675		34.6154	18.8406		60	11.9473	42.6919		69.7368	99.8026	99.4152	99.6409	100	99.3833	99.8845	99.9023	99.7549	99.9067
	64707	A	79.3814	77.4021	99.7266	87.509	98.7611	99.7713	99.6453	99.9635		13.0753								71.0619
	65569	T	78.5068	77.234	76.6239	88.9399	99.725	99.7452	99.4929	99.8292
	65570	T	78.5068	77.234	76.6239	88.9399	99.725	99.7452	99.4929	99.8292
	65574	T	81.4732	80.5274	78.9023	90.0662	99.8018	99.7512	99.321	99.925
	65709	A	87.0968	88.4956	78.5293	88.1426	99.6872	99.9047	99.5972	99.9701
	65757	T	92.6667	91.9003	77.416	87.1039	97.6079	98.9336	98.3916	98.8711
	65815	A	93.6675	93.9241	77.8524	86.8213	99.5558	99.8585	99.0861	99.8315
	65827	A	91.4894	91.6049	78.1924	87.7021	99.8515	99.9525	99.5098	99.9542										10.4239
	66260	C																		19.8844	54.4073	99.5888
	67043	T	99.3644	99.0762	99.0731	89.5198	99.2984	99.2778	98.9691	98.9705	99.4495	99.2826	81.5722	98.7778						18.204
	67606	C	89.1566	89.6797	78.6801	89.4387	99.6362	99.7777	99.6841	99.9231										69.6525
	67732	T			19.5798						99.1397	99.2582	78.698	98.6579	99.2002	68.75			23.5294	27.2089			27.8481
	67854	T	82.9457	83.1933	73.752	79.1142	99.3171	99.7247	99.1957	99.7882										68.4697
	68365	C			19.5511	10.6535					99.7053	99.0293	98.5413	98.9426		18.5185	55.5556			29.0862	30.6605			99.2541	99.6418	99.1071	99.2933	93.9352	99.4161	99.5945	99.5712	99.5887
	68938	C	87.2038	84.9462	76.6573	88.4497	99.9376	100	99.8634	100
	68942	C	85.7143	84.7953	75.1898	88.0698	99.8626	100	99.6439	100
	68948	C	84.8958	84.0491	73.7287	87.0076	99.7008	99.8826	99.6103	99.931
	68955	G	84.3023	84.106	72.981	85.4557	99.9168	100	99.3328	99.9223
	68963	C	54.5894	49.0385	45.6433	53.7951	60.9712	55.7297	60.3118	56.25
	68968	C	43.4783	42.1525	40.4356	46.3066	52.4138	49.8141	51.6733	49.3914
	68973	C	47.7064	50.6608	42.2754	45.1008	51.3466	52.9795	48.0046	53.4741
	68980	G	60.9524	65.2968	49.7826	57.0956	64.8538	62.4174	55.9531	62.3073
	68988	C	86.8687	90.6736	72.9792	85.4907	100	99.8759	99.7329	99.8896
	68993	C	86.7299	90.1869	74.4571	85.9276	99.7832	99.8837	99.577	100
	69065	C	83.9228	93.6102	83.5	89.9475	99.8664	100	99.6706	99.9445
	69084	G	86.8421	91.2052	82.3717	88.9005	99.9068	100	99.8847	99.962
	69333	T	90.1163	89.2754	79.8337	90.1523	99.8546	99.8839	99.4291	99.9589
	69381	C	88.8579	87.2521	79.0215	90.0137	99.9085	99.8249	99.3409	100
	69533	T	85.7143	85.1064	77.8972	89.0346	98.4941	98.8578	98.5288	98.8703
	69556	T	81.0277	80.6167	78.1534	89.7612	98.86	99.2442	98.9945	99.2672
	70710	C			18.6144						99.8375	99.8764	89.3597	99.8124	99.9368					99.9876
	70715	G			19.1152						99.8381	99.9299	89.6104	99.8324	99.9376					99.9753
	71243	G	65.3846	44.7761	99.4653	89.2704	99.3982	99.6479	98.93	99.8083
	71244	A	65.3846	44.7761	99.4653	89.2704	99.3982	99.6479	98.93	99.8083
	71805	T	58.1081	62.6374	80.4843	90.4401	99.3902	99.0777	99.7992	99.8532
	72691	G	72.8205	73.2719	81.4374	92.5103	99.7363	100	99.665	99.7561	100	99.3007	86.9529	99.571	99.9363	46.5116				28.3822			23.5294
	72698	C	69.163	68.0162	81.9304	91.8074	99.7255	100	99.5671	100	99.689	99.1853	86.9885	99.7043	99.8128	50				28.6338			21.4286
	72699	C	69.163	68.0162	81.9304	91.8074	99.7255	100	99.5671	100	99.689	99.1853	86.9885	99.7043	99.8128	50
	72772	G	69.0647	66.9683	80.9855	92.9071	99.9117	99.9014	99.8675	99.9039
	72778	G									99.1404	99.3096	88.0583	99.7022
	72791	A	64.7273	62.9893	81.0518	93.3972	100	99.9	100	99.8981
	72809	T	99.8134	99.8185	99.7539	93.318	100	100	100	99.8927					99.9366	88	88.2353	99.8457	60				33.3333
	10-20%		9	4	10	4	1	3	3	3	0	3	6	0	1	2	4	2	3	18	1	1	0	0	0	0	1	0	2	2	1	2
	20-30%		1	5	6	1	1	1	3	1	4	5	2	4	1	5	3	1	2	12	5	1	9	4	4	4	2	4	3	3	3	1
	30-40%		2	1	2	4	3	4	1	1	3	5	2	3	4	5	6	4	3	4	7	3	7	2	2	2	3	2	1	1	2	2
	40-50%		4	5	6	3	2	1	3	4	3	3	4	2	3	10	2	2	9	3	4	4	2	3	3	3	3	3	0	0	1	4
	50-60%		3	6	3	4	3	3	3	3	0	1	2	1	1	3	2	1	3	1	2	1	4	0	0	0	0	0	3	3	2	1
	60-70%		20	17	1	3	4	4	4	4	1	1	0	1	0	2	1	0	0	7	1	0	4	1	1	1	1	1	1	1	1	0
	70-80%		32	35	35	1	2	0	1	0	1	2	6	1	0	2	2	0	0	10	0	0	0	0	0	0	0	0	0	0	0	0
	80-90%		20	13	16	36	1	0	1	1	2	4	30	2	1	2	1	1	0	3	0	0	1	0	0	0	0	0	0	0	0	0
	90-100%		9	13	31	44	80	82	79	81	39	32	3	37	18	1	2	5	2	13	0	2	2	7	7	7	7	7	8	8	8	8

## Sheet: 3. CDS based mtDNA haplotype 
	Table S3. Mitochondrial haplotype classification of S. endobioticum isolates based on informative sites in coding sequences of seven mitochondrial genes.
	Assignation to mitochondrial lineage based on the clustering analysis of the entire mtDNA genome is indicated as mtDNA group
	Haplotype (mtDNA CDS)	mtDNA group (lineage)	Strain	Origin
	1	1	1(D1)_MB42	the Netherlands
		1	1(D1)_NED_01	the Netherlands
	2	1	2(Ch1)_03WS	Poland
		1	3(M1)_04WS	Poland
		1	P40_09WS	Denmark
		1	P41_10WS	Poland
		1	unknown_UKR_01	Ukraine
	3	1	2(G1)_MB08	the Netherlands
		1	6(O1)_LEV6574	Canada
		1	6(O1)_LEV6602	Canada
		1	6(O1)_LEV6687	Canada
		1	6(O1)_LEV6748	Canada
	4	1	unknown_RUS_01	Russian Federation
	5	1	1(D1)_01WS	Germany
		1	39(P1)_08WS	Poland
		1	unknown_BEL_01	Belarus
		1	6(O1)_E/II/2015	Laboratory strain obtained after two multiplications of strain 1/2007/D1 (01WS) on cultivar Erika
	6	2	2(G1)_02WS	Germany
	7	2	2(G1)_SE4	Germany
		2	6(O1)_SE5	the Netherlands
		2	6(O1)_SE6	Germany
	8	3	8(F1)_DEN_01	Denmark
		3	18(T1)_07WS	Greece
		3	18(T1)_MB17	the Netherlands
		3	18(T1)_SE7	the Netherlands
		3	38(Nevsehir)_MB56	Turkey
		3	unknown_FERA_01	United Kingdom
		3	unknown_FERA_02	United Kingdom
	9	3	8(F1)_06WS	the Netherlands
	10	4	unknown_PER_03	Peru

## Sheet: 4. StrainInfo
	Table S4. Fungal materials and NextGen sequence information
	Synchytrium endobioticum
	Pathotype based on EPPO PM7/28(1)	isolate	origin	Sequence data generated	SRA accession	Reads mapped to mtDNA	Mean coverage (x)	length mtDNA (bp)	mtDNA accession(s)
	1(D1)	MB42	Langenboom, the Netherlands	HiSeq PE100, 6.18 Gb	ERR2286952, ERR2286953	2848801	4360	72865	ERZ668671
				MiSeq PE250, 5.12 Gb	ERR2286954
				PacBio SMRT, 65.3 Mb	ERR2698824
	1(D1)	1/2007/D1 (01WS)	Germany	HiSeq PE125, 7.08 Gb	ERR2286106	1080757	1760	72938	ERZ668651
	1(D1)	NED01	Brabant, the Netherlands	HiSeq PE100, 7.56 Gb	ERR2286957	3740284	4905	72868	ERZ668673
	2(G1)	4/2005/G1 (02WS)	Germany	HiSeq PE125, 29.9 Gb	ERR2286913, ERR2286914	1450581	2387	72824	ERZ668652
	2(G1)	MB08	Mussel, the Netherlands	HiSeq PE125, 44.4 Gb	ERR2286949, ERR2286950	14230974	23485	72888	ERZ668669
	2(G1)	BBA 2(G1) 09-04 (SE4)	Germany	HiSeq PE125, 51.1 Gb	ERR2286960, ERR2286961	5368430	8837	72839	ERZ668676
	6(O1)	PL28/2007/2 (04WS)	Poland	HiSeq PE125, 30.3 Gb	ERR2286917, ERR2286918	1121611	1862	72889	ERZ668654
	6(O1)	DK17/2015 (09WS)	Denmark	HiSeq PE125, 49.4 Gb	ERR2286930, ERR2286931. ERR2286932	344557	125	72888	ERZ668658
	6(O1)	PL2/2015 (10WS)	Poland	HiSeq PE125, 45.8 Gb	ERR2286933, ERR2286934, ERR2286935	226664	125	72889	ERZ668659
	6(O1)	E/II/2015	Laboratory strain obtained after two multiplications of strain 1/2007/D1 (01WS) on cultivar Erika	HiSeq PE125, 7.18 Gb	ERR2286939	46294	75	72908	ERZ668662
	6(O1)	LEV6574	St. Eleanor's, Prince Edward Island, Canada	MiSeq PE300, 38.9 Gb	ERR2286942, ERR2286943, ERR2286944, ERR2286945	65232021	163200	72889	ERZ668665
				PacBio SMRT, 35.5 Mb	ERR2698823
	6(O1)	LEV6602	Augustine Cove, Prince Edward Island, Canada	MiSeq PE300, 7.54 Gb	ERR2286946	12497168	41913	72889	ERZ668666
	6(O1)	LEV6687	New Annan, Prince Edward Island, Canada	MiSeq PE300, 12.1 Gb	ERR2286947	10504480	35926	72891	ERZ668667
	6(O1)	LEV6748	New Glasgow, Prince Edward Island, Canada	MiSeq PE300, 12.0 Gb	ERR2286948	3242947	251	72894	ERZ668668
	6(O1)	HLB 6(O1) 02-06 (SE5)	the Netherlands	HiSeq PE100, 6.05 Gb	ERR2286962	2025653	2689	72884	ERZ668677
	6(O1)	BBA 6(01) 05_8.3 (SE6)	Germany	HiSeq PE100, 42.6 Gb	ERR2286963, ERR2286964	20702761	33795	72900	ERZ668678
	8(F1)	DEN01	Jylland, Denmark	HiSeq PE125, 62.1 Gb	ERR2286937, ERR2286938	4197193	6938	72872	ERZ668661
	8(F1)	3/2005/F1 (06WS)	the Netherlands	HiSeq PE125, 17.3 Gb	ERR2286919, ERR2286920, ERR2286921, ERR2286922, ERR2286923, ERR2286924, ERR2286925	1332731	2653	72941	ERZ668655
	8(F1)	2/2005/Ch1 (03WS)	Poland	HiSeq PE125, 31.6 Gb	ERR2286915, ERR2286916	1533292	2540	72889	ERZ668653
	18(T1)	GR2/2015 (07WS)	Greece	HiSeq PE125, 6.70 Gb	ERR2286926	1679744	2763	72931	ERZ668656
	18(T1)	MB17	Borgercompagnie, the Netherlands	HiSeq PE100, 6.94 Gb	ERR2286951	1821241	2386	72907	ERZ668670
	18(T1)	HLB P18(T1) -02-06 (SE7)	Borgercompagnie, the Netherlands	HiSeq PE100, 7.91 Gb	ERR2286965	2495395	3291	72896	ERZ668679
	38(Nevsehir)	MB56	Nevsehir, Turkey	HiSeq PE100, 34.5 Gb	ERR2286955, ERR2286956	19870357	32255	72910	ERZ668672
	39(P1)	PL69/2009 (08WS)	Piekielnik, Poland	HiSeq PE100, 48.4 Gb	ERR2286927, ERR2286928, ERR2286929	1679744	4037	72874	ERZ668657
	unknown	BEL01	Belarus	HiSeq PE100, 1.31 Gb	ERR2286936	43067	68	72874	ERZ668660
	unknown	FERA1	United Kingdom	HiSeq PE100, 32.6 Gb	ERR2286940	387230	493	72775	ERZ668663
	unknown	FERA2	United Kingdom	HiSeq PE100, 33.6 Gb	ERR2286941	400095	510	72810	ERZ668664
	unknown	PER03	Aco Paucartambo, Pasco, Peru	HiSeq PE100, 6.57 Gb	ERR2286958	10418036	17309	72814	ERZ668674
	unknown	RUS01	St. Petersburg, Russian Federation	HiSeq PE100, 1.94 Gb	ERR2286959	123602	202	72879	ERZ668675
	unknown	UKR01	Ukraine	HiSeq PE100, 2.25 Gb	ERR2286966	31611	50	72879	ERZ668680
	other Chytridiomycota
	species	strain	origin	Sequence data generated		Reads mapped to mtDNA	Mean coverage (x)	length mtDNA (bp)	mtDNA accession(s)
	Chytridium confervae	CBS 675.73	Canada	HiSeq PE125, 3.50 Gb	ERR2451316	3113642	1731	225604	ERZ681044
	Powellomyces hirtus	CBS 809.83	the Netherlands	HiSeq PE125, 28.6 Gb	ERR2451317	29555878	6929	298453	ERZ681050
	Spizellomyces palustris (= Phlyctochytrium palustre)	CBS 455.65	Germany	HiSeq PE125, 3.57 Gb	ERR2451319	3538853	3508	126474	ERZ681046
	Synchytrium microbalum	JEL517	Hancock Co., Maine, USA	HiSeq PE125, 4.23 Gb	ERR2451318	247495	1300	23811	ERZ681045
	Synchytrium taraxaci	Stara13	Bennekom, the Netherlands	HiSeq PE125, 27.0 Gb	ERR2451320	7656249	26745	39246	ERZ681051
